# Supplementary material for: Intra-Articular Injection of Cross-Linked Hyaluronic Acid-Dexamethasone Hydrogel Attenuates Osteoarthritis: An Experimental Study in a Rat Model of Osteoarthritis
Source: MDPI journal article supplement (doi:10.3390/ijms17040411), 2016-04-15
Supplement: s1 [file s1]

# Supplementary Materials: Intra-Articular Injection of Cross-Linked Hyaluronic Acid-Dexamethasone Hydrogel Attenuates Osteoarthritis: An Experimental Study in a Rat Model of Osteoarthritis

Zhiwei Zhang, Xiaochun Wei, Jizong Gao, Yu Zhao, Yamin Zhao, Li Guo, Chongwei Chen, Zhiqing Duan, Pengcui Li and Lei Wei

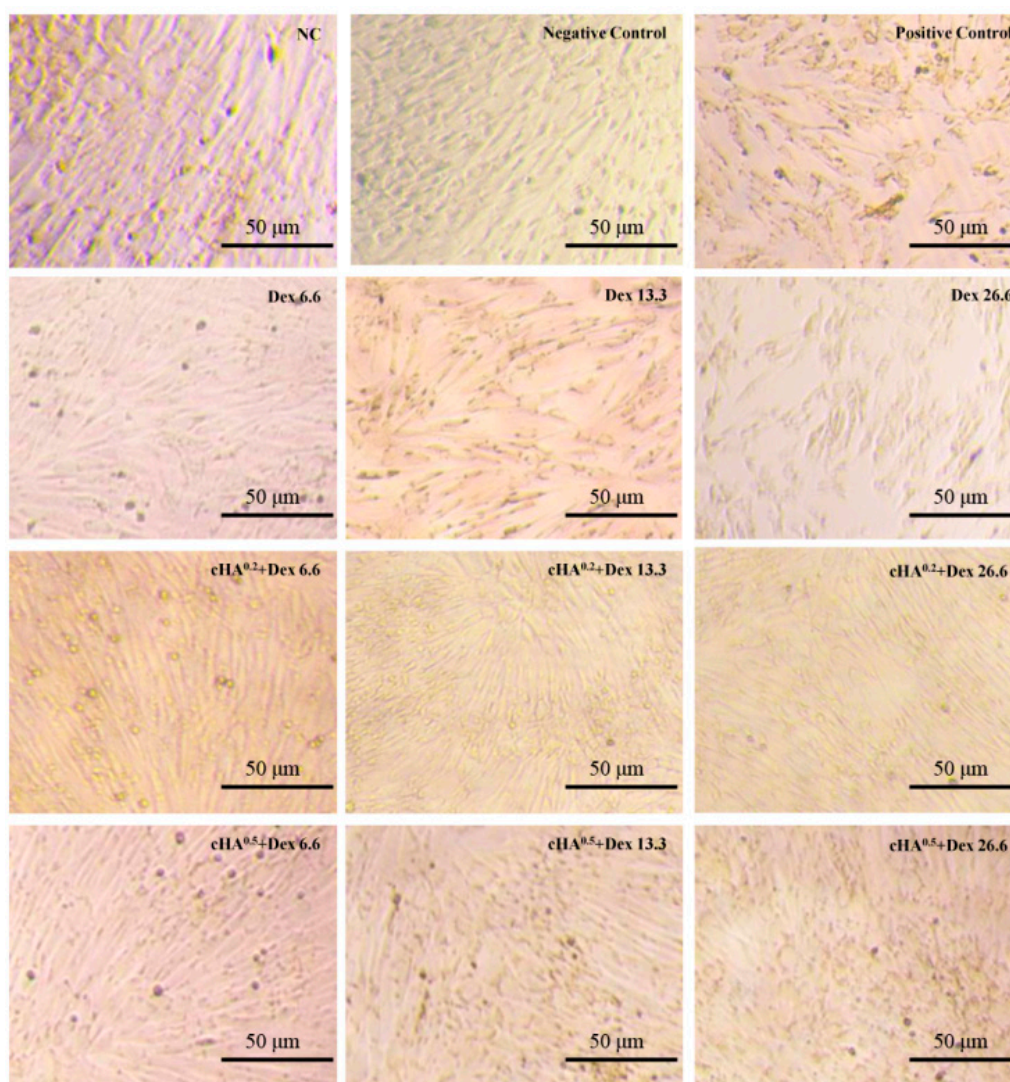

**Figure S1.** cHA-Dex hydrogel exhibited low cytotoxicity *in vitro* compared with Dex alone.
